# Supplementary material
Source: Springer Nature journal article supplement (https://www.springermedizin.de/resource/supplementary/12872_2005_105_MOESM5_ESM.pdf/9431032)
Supplement: MOESM5 [file 9431032]

**Table: 2 Voisard et al.**

|                        | <b>HUVEC</b> | <b>HCAEC</b> | <b>HCMSMC</b>  |
|------------------------|--------------|--------------|----------------|
| C                      | 100 ± 0      | 100 ± 0      | 100 ± 0        |
| 0,0002 µg/ml Abciximab | 96,41 ± 6,16 | 88,5 ± 7,2   | 100,18 ± 17,10 |
| 0,002 µg/ml Abciximab  | 93,77 ± 3,88 | 87,17 ± 9,02 | 91,86 ± 15,64  |
| 0,02 µg/ml Abciximab   | 90,19 ± 1,77 | 88,35 ± 3,04 | 90,85 ± 11,33  |
| 0,2 µg/ml Abciximab    | 90,37 ± 7,38 | 85,09 ± 8,27 | 86,90 ± 8,43   |
| 2 µg/ml Abciximab      | 83,47 ± 2,51 | 91,87 ± 3,25 | 85,79 ± 8,56   |
| 20 µg/ ml Abciximab    | 79,34 ± 9,16 | 87,70 ± 6,01 | 81,09 ± 7,59   |
